# Supplementary material for: Increased Oxidative Stress Impairs Adipose Tissue Function in Sphingomyelin Synthase 1 Null Mice
Source: PubMed Central journal article supplement (PMC3625169; doi:10.1371/journal.pone.0061380), 2013-04-12
Supplement: pone.0061380.s001.pdf [file pone.0061380.s001.pdf]

Table S1.

| Target gene                                                                 | Forward primer                      | Reverse primer                      |
|-----------------------------------------------------------------------------|-------------------------------------|-------------------------------------|
| Krüppel-like factor 7 (KLF7)                                                | CGGAGCGATGAGCTCAC<br>AAG            | TCATATGGAGCGCAAG<br>ATGGTC          |
| C/EBP $\beta$                                                               | CTATTTCTATGAGAAAA<br>GAGGCGTATGTAT  | ATTCTCCCAAAAAAGT<br>TTATTAATAATGTCT |
| C/EBP $\alpha$                                                              | TCTGCGAGCACGAGACG<br>TC             | AACTCGTCGTTGAAGG<br>CGG             |
| Peroxisome<br>proliferator-activated receptor- $\gamma$<br>(PPAR $\gamma$ ) | TTTAAAAACAAGACTAC<br>CCTTTACTGAAATT | AGAGGTCCACAGAGCT<br>GATTCC          |
| Fatty acid binding protein 4<br>(FABP4)                                     | CACCGCAGACGACAGGA<br>AG             | GCACCTGCACCAGGGC                    |
| Bax                                                                         | CAGGATGCGTCCACCAA<br>GAA            | GTTGAAGTTGCCATCA<br>GCAAACA         |
| CHOP                                                                        | AGCTGGAAGCCTGGTAT<br>GAGGA          | AGCTAGGGACGCAGGG<br>TCAA            |
| Bim                                                                         | CGACAGTCTCAGGAGGA<br>ACC            | CCTTCTCCATACCAGA<br>CGGA            |
| Peroxiredoxin 1 (Prdx1)                                                     | ACACCCAAGAAACAAGG<br>AGGATT         | CAACGGGAAGATCGTT<br>TATTGTTA        |
| Prdx2                                                                       | AACGCGCAAATCGGAAA<br>GT             | AGTCCTCAGCATGGTC<br>GCTAA           |
| Prdx3                                                                       | GGCCACATGAACATCAC<br>ACTGT          | CAAACCTGGAACGCCTT<br>TACCA          |
| Prdx4                                                                       | TCCTGTTGCGGACCGAA<br>T              | GATCTTGGCTTTGCTTA<br>GATGCA         |
| Prdx5                                                                       | GAAAGAAGCAGGTTGGG<br>AGTGT          | CCCAGGGACTCCAAAC<br>AAAA            |
| Prdx6                                                                       | TTGATGATAAGGGCAGG<br>GAC            | CTACCATCACGCTCTCT<br>CCC            |

|                                 |                                 |                               |
|---------------------------------|---------------------------------|-------------------------------|
| Catalase                        | GCGTCCAGTGCGCTGTA<br>GA         | TCAGGGTGGACGTCAG<br>TGAA      |
| Glutathione peroxidase 1 (Gpx1) | GGGACTACACCGAGATG<br>AACGA      | ACCATTCACTTCGCAC<br>TTCTCA    |
| Gpx3                            | GCCAGCTACTGAGGTCT<br>GACAGA     | CCACCTGGTCGAACAT<br>ACTTGAG   |
| Gpx4                            | TCTGGCAGGCACCATGT<br>GT         | CGGGCATGCAGATCGA<br>CTA       |
| Superoxide dismutase 1 (SOD1)   | AGCATTCCATCATTGGC<br>CGTA       | TACTGCGCAATCCCAA<br>TCACTC    |
| SOD2                            | GAGAATCTCAGTGCTCA<br>CTCGTGTC   | TGCTGCCAGTCAGAAA<br>TCCAA     |
| SOD3                            | CCAGCTTCGACCTAGCA<br>GACA       | CAGCGTGGCTGATGGT<br>TGTA      |
| Thioredoxin 1 (Txn1)            | TTTCCATCTGGTTCTGCT<br>GAGA      | TGGAAGAAGGGCTTGA<br>TCATTT    |
| Glutaredoxin 1 (Glx1)           | CAACACCAGTGCGATTC<br>AAGA       | GCAGAGCTCCAATCTG<br>CTTCA     |
| Glx2                            | TGGAATATGGCAACCAG<br>TTTCA      | GGCGACTATCCACATC<br>ATTCAA    |
| mtHsp70                         | CGTGAGCAACAGATTGT<br>AATCCAGT   | GCCATATTAAGTCTT<br>CAACACGTTT |
| mtHsp40                         | GCCTGTATGAGACAATC<br>AATGTGACGA | GTGAATGTAGTGGTCA<br>CCATAGCCA |
| mtHsp60                         | TCATCGGAAGCCATTGG<br>TCATA      | GCTTTGACTGCCACAA<br>CCTGAA    |
| mtHsp10                         | TGCTGCCGAAACTGTAA<br>CCAA       | CTTTCACACTGACAGG<br>CTCAATCTC |
| Calnexin                        | GACTGTAGCTTTGCCAG<br>TGTTCCCT   | GAGCATCCGTCTTCTT<br>GTACTCCA  |

|                                                           |                                 |                                |
|-----------------------------------------------------------|---------------------------------|--------------------------------|
| HSP90B1                                                   | ACACTTCGGTCAGGATA<br>TCTTCTACCA | GGTTCTTCCTCCACCTG<br>TGCTT     |
| HSP70-1                                                   | TCTCCTGGCTGGACTCCA<br>ACAC      | ACCCTGGTACAGCCCA<br>CTGA       |
| LONP1                                                     | AGGAGAAGACCATTGCG<br>GCTAA      | AAAGGAGCTAAATCCG<br>AGTAGTCCT  |
| ClpP                                                      | TCATTGCCCAGCTGTTGT<br>TCTTA     | GGTTCAGGATGTACTG<br>CATTGTGTC  |
| YME1L1                                                    | AAGGCGAACTCGTCTGA<br>TCCTC      | GACAGGGTCTACCGCA<br>GAATCAA    |
| AFG3L2                                                    | CCACTGCGAGGATGATA<br>GACGATG    | GCTGGACCATGTCATT<br>CTTGTCTAGG |
| PPAR $\gamma$ coactivator-1 $\alpha$<br>(PGC-1 $\alpha$ ) | CCGTAAATCTGCGGGAT<br>GATG       | CAGTTTCGTTTCGACCT<br>GCGTAA    |
| PGC-1 $\beta$                                             | GTGCCAGGTGCTGACGA<br>GAA        | AGTGTATCTGGGCCAA<br>CGGAAG     |
| mitochondrial transcription<br>factor A (Tfam)            | TGAAGCTTGTAATGAG<br>GCTTGGA     | CGGATCGTTTCACACT<br>TCGAC      |
| Complex I, NADH<br>dehydrogenase subunit 4 (ND4)          | CATCACTCCTATTCTGCC<br>TAGCAA    | TCCTCGGGCCATGATT<br>ATAGTAC    |
| ND6                                                       | AGGTGAAGGCTTTAATG<br>CTAACCC    | GGTCGCAGTTGAATGC<br>TGTGT      |
| Complex I, $\alpha$ -subcomplex 9<br>( $\alpha$ s9)       | CCCGGGCCAGCTTACCT               | GCTGCACTGCTTTCCTG<br>ATAGA     |
| Complex III, Cytochrome b<br>subunit (Cyt.b)              | GCCACCTTGACCCGATT<br>CT         | TTGCTAGGGCCGCGAT<br>AAT        |
| Complex III, subunit core 1<br>(QCR1)                     | GCTGGGCGCACACTTTG<br>T          | CACTGGCCTTGCAGGA<br>AGAA       |
| Cytochrome <i>c</i> (Cyt.c)                               | GGCTGCTGGATTCTCTTA<br>CACA      | CCAATACTCCATCAG<br>GGTATCCT    |

|                                                  |                               |                                     |
|--------------------------------------------------|-------------------------------|-------------------------------------|
| Complex IV, Cytochrome Oxidase subunit 1 (Cox 1) | TTTTCAGGCTTCACCCTA<br>GATGA   | GAAGAATGTTATGTTT<br>ACTCCTACGAATATG |
| Cox2                                             | CCATCCCAGGCCGACTA<br>AA       | TTTCAGAGCATTGGCC<br>ATAGAA          |
| Cox3                                             | CGGAAGTATTTTTCTTTG<br>CAGGAT  | CAGCAGCCTCCTAGAT<br>CATGTG          |
| Cox4                                             | TGCAGACCAAGCGAATG<br>CT       | TAGTCCCACTTGGCGG<br>AGAA            |
| Cox5b                                            | CGTCCATCAGCAACAAG<br>AGAATA   | GCAGCCAAAACCAGAT<br>GACA            |
| Complex V, ATP synthase 6 (ATPase6)              | GGCTCCCGACACAAACT<br>AAAAAG   | TGGAATTAGTGAAATT<br>GGAGTTCCT       |
| ATP5a1                                           | ATGTGTCCGCTTACATTC<br>CAACAA  | GATCCGACACGGGACA<br>CAGA            |
| ATP5b                                            | ACATGGGCACAATGCAG<br>GAA      | GTCAGGTCATCAGCAG<br>GCACA           |
| ATP5c1                                           | AAGTTCGAAACATGGCA<br>ACTCTGA  | ACTTTGCAGCTGCCAC<br>CATC            |
| $\beta$ -actin                                   | CATCCGTAAGACCTCT<br>ATGCCAAC  | ATGGAGCCACCGATCC<br>ACA             |
| F4/80                                            | GAGATTGTGGAAGCATC<br>CGAGAC   | GATGACTGTACCCACA<br>TGGCTGA         |
| CD68                                             | CATCAGAGCCCGAGTAC<br>AGTCTACC | AATTCTGCGCCATGAA<br>TGTCC           |
